# Supplementary material for: Magnetic properties and molecular structures of binuclear (2-pyrazinecarboxylate)-bridged complexes containing Re(iv) and M(ii) (M = Co, Ni)
Source: Royal Society of Chemistry journal article supplement (doi:10.1039/b611888g), 2006-11-21

Perspective views of the Re(IV) polyhedron in compounds **1**, **2**, and **3** (Figure S1), Packing of **1** along *y* axis (Figures S2 and S4), and polyhedron around M(II) in **2** and **3** (Figure S3).

**Figure S1.** View of the coordination around Re(IV) in the N(2)-Re-Br(1) direction for compounds **1** (a), **2** (b), and **3** (c). Code color: Re, purple; Br, green; O, red; N, blue; C, grey.

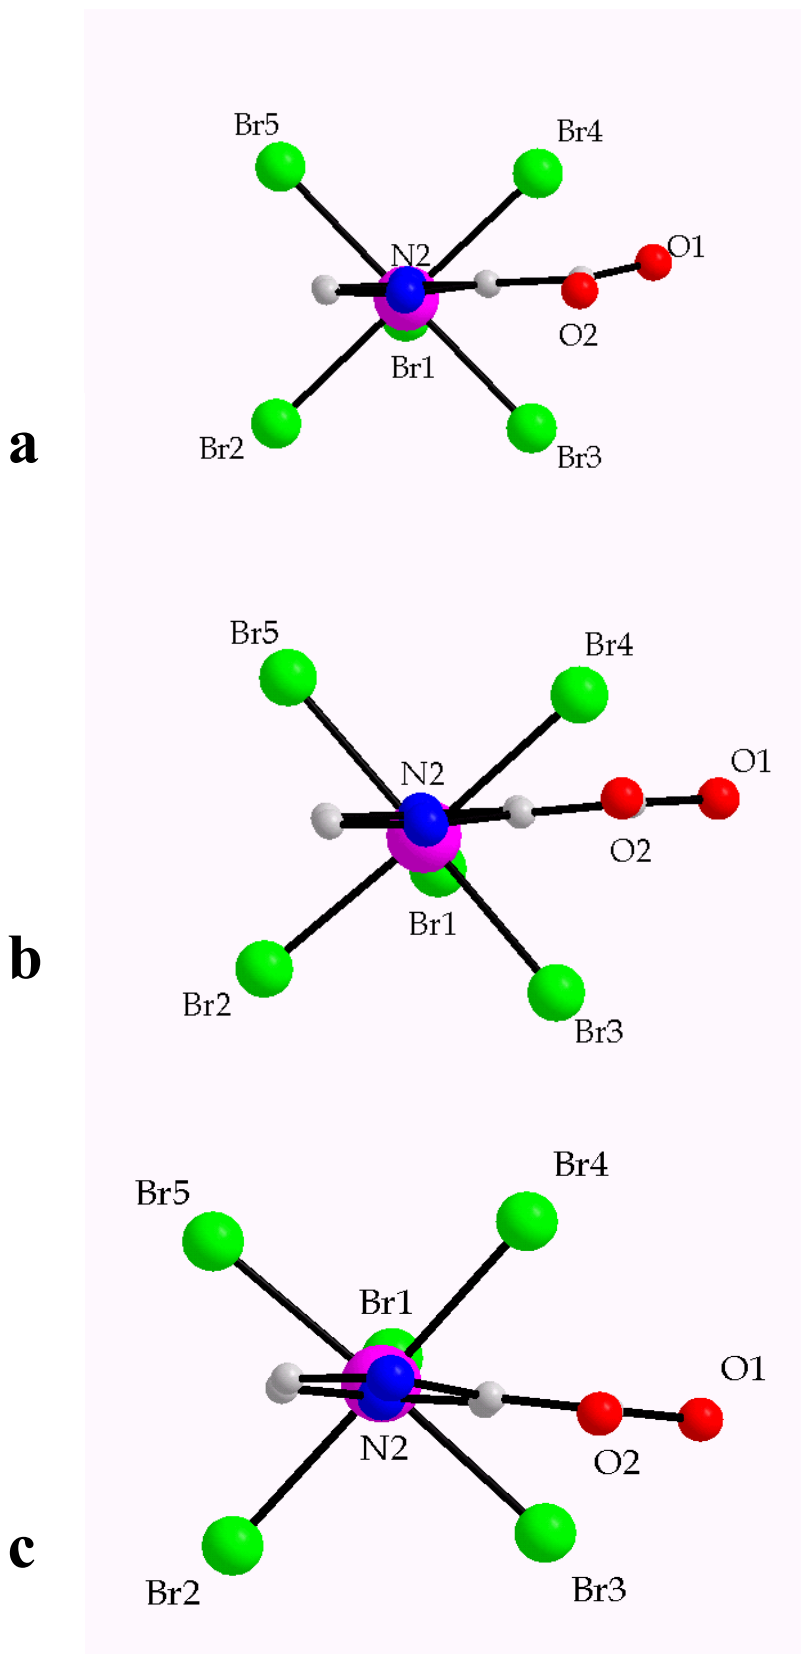

**Figure S2.** Ball and stick diagram of compound **1** along y axis. Color code: rhenium, purple; bromine, green; oxygen, red; nitrogen, blue; carbon, grey.

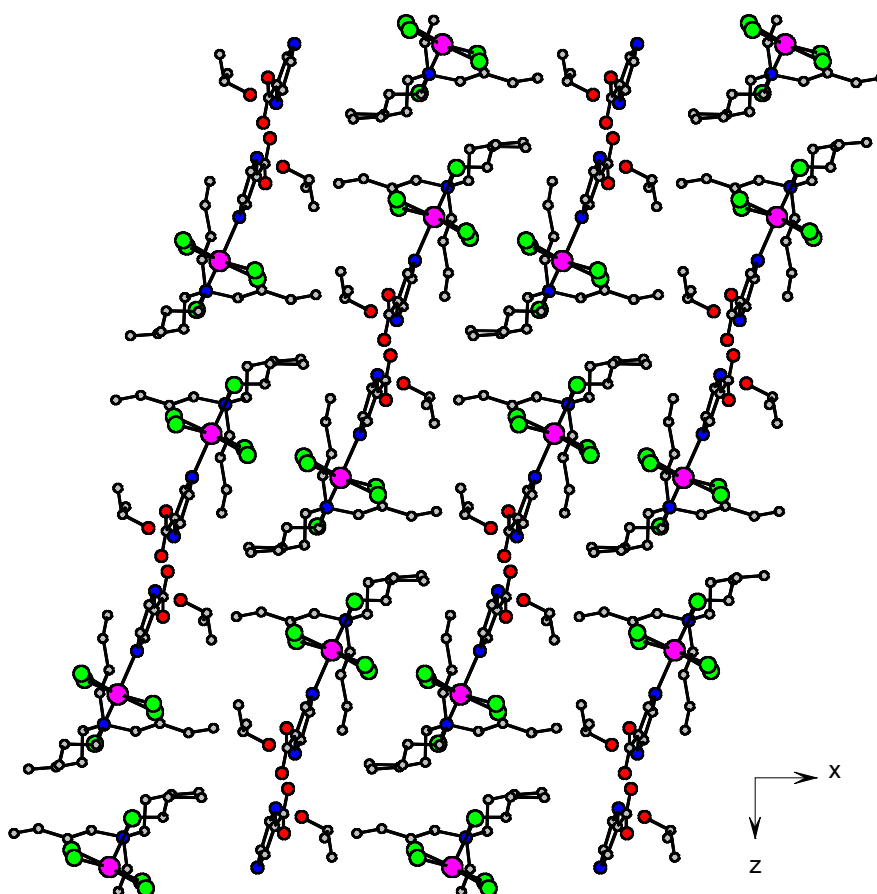

**Figure S3.** Perspective drawing of the M(II) polyhedron in compounds **2** (a) and **3** (b).  
Code color: Re, purple; Br, green; O, red; N, blue; C, grey; Co, orange; Ni, dark green.

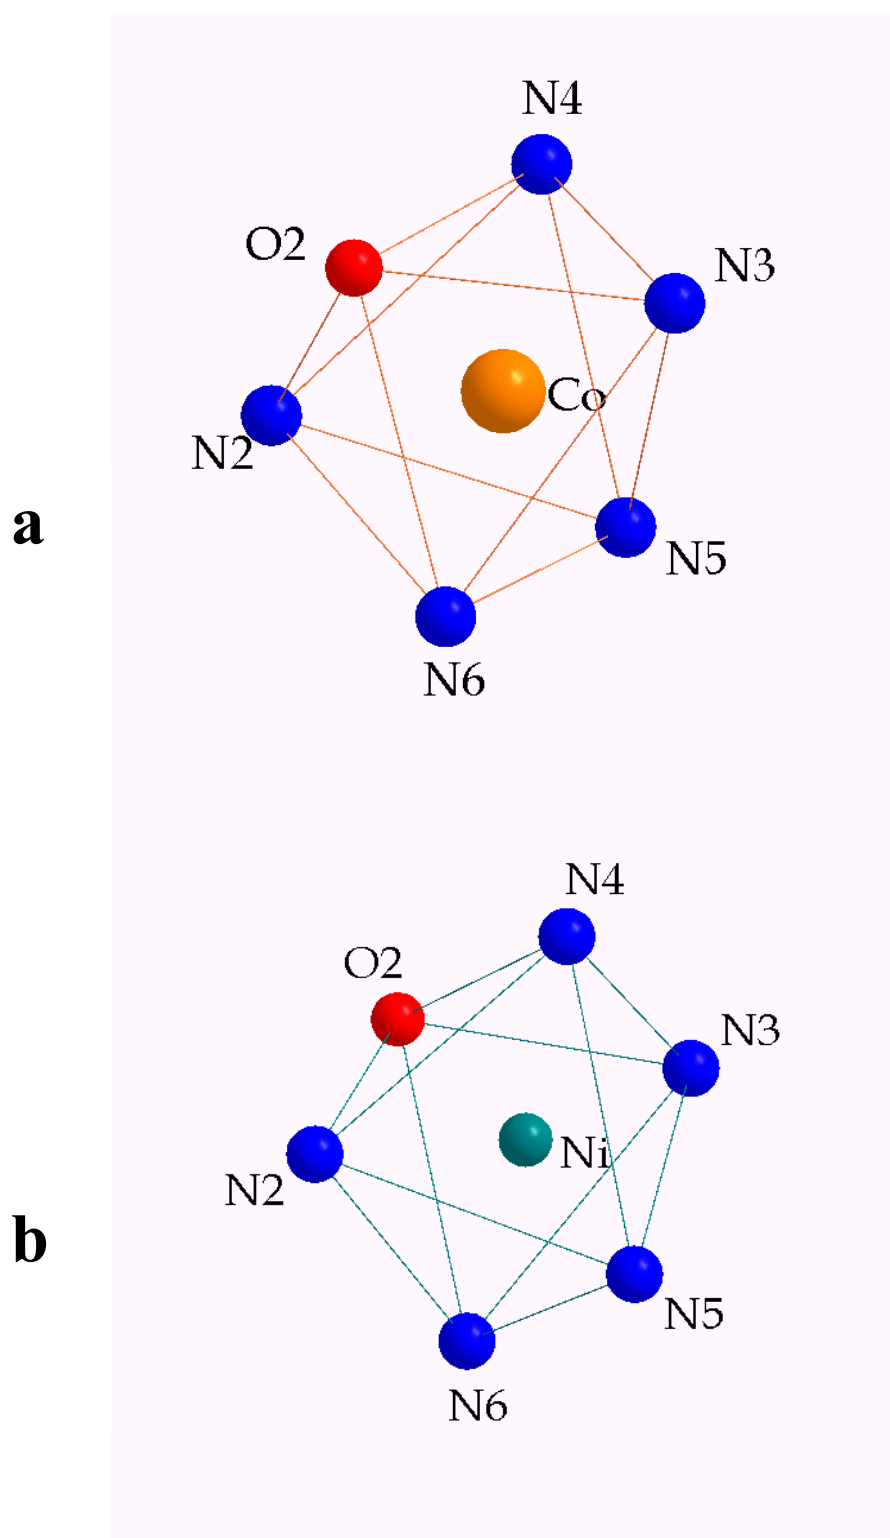

**Figure S4.** Perspective drawing of 1 along y direction showing the zigzag chains and shortest distances Br $\cdots$ Br. Code color: Re, purple; Br, green; O, red; N, blue; C, grey for

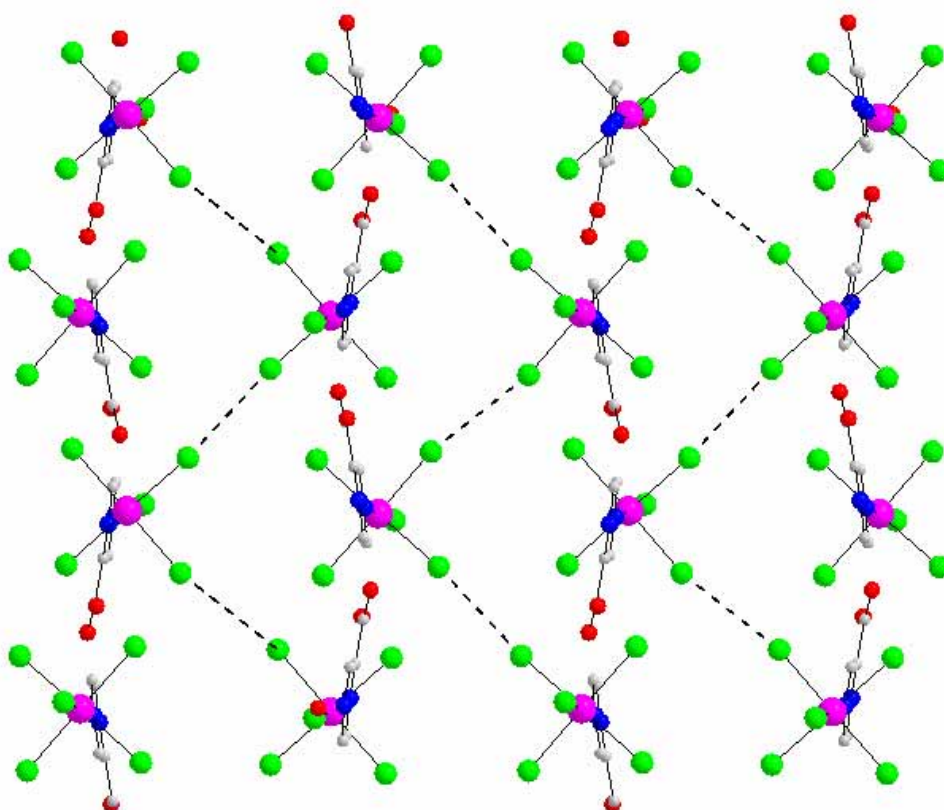

Supplement: b611888g.pdf [file b611888g.pdf]
